# Supplementary material
Source: publisher site journal article supplement (http://www.kjim.org/upload/media/kjim-2021-427-suppl2.pdf)
Supplement: Supplementary file 1 [file kjim-2021-427-suppl2.pdf]

**Supplementary Table 2. Univariable analysis for predictors of recurrent acute myocardial infarction within 3 years**

| Variable                                          | Odds ratio (95% CI) | <i>p</i> value |
|---------------------------------------------------|---------------------|----------------|
| Age ≥ 75 yr                                       | 1.391 (1.086–1.782) | 0.009          |
| Women                                             | 1.393 (1.109–1.751) | 0.004          |
| Heart rate > 100 beats/min                        | 1.412 (1.031–1.933) | 0.031          |
| Killip class III or IV                            | 1.604 (1.216–2.117) | 0.001          |
| Hypotension (SBP < 100 mmHg)                      | 0.855 (0.582–1.258) | 0.428          |
| Hypertension                                      | 1.422 (1.149–1.760) | 0.001          |
| Diabetes mellitus                                 | 1.853 (1.492–2.301) | < 0.001        |
| Dyslipidemia                                      | 1.016 (0.727–1.420) | 0.927          |
| Previous heart failure                            | 2.604 (1.303–5.204) | 0.007          |
| Previous CVA                                      | 1.302 (0.878–1.933) | 0.190          |
| Smoking                                           | 0.738 (0.598–0.912) | 0.005          |
| Renal dysfunction (Cr > 1.3 mg/dL)                | 1.952 (1.487–2.563) | < 0.001        |
| Obesity (BMI > 25 kg/m <sup>2</sup> )             | 0.939 (0.750–1.175) | 0.583          |
| Atypical chest pain                               | 1.747 (1.332–2.291) | < 0.001        |
| Family history of AMI                             | 1.060 (0.701–1.605) | 0.781          |
| Target lesion location                            |                     |                |
| LM                                                | 1.869 (1.263–2.766) | 0.002          |
| LAD                                               | 1.442 (1.124–1.851) | 0.004          |
| LCx                                               | 1.234 (0.999–1.523) | 0.051          |
| RCA                                               | 1.166 (0.943–1.442) | 0.155          |
| Multivessel disease                               | 1.636 (1.317–2.032) | < 0.001        |
| Post-TIMI flow < III                              | 0.884 (0.434–1.803) | 0.735          |
| Lesion type B2 or C                               | 1.074 (0.782–1.477) | 0.658          |
| ST elevation MI                                   | 0.925 (0.749–1.142) | 0.467          |
| Total ischemic time > 12 hr                       | 1.184 (0.959–1.462) | 0.116          |
| Ejection fraction < 50%                           | 1.219 (0.980–1.514) | 0.075          |
| Maximum troponin I > 51.3                         | 0.910 (0.701–1.180) | 0.475          |
| Atrial fibrillation                               | 1.128 (0.627–2.029) | 0.689          |
| LDL-C ≥ 70 mg/dL or ≤ 50% reduction from baseline | 0.935 (0.582–1.502) | 0.780          |
| Aspirin                                           | NA                  | 0.998          |
| Prasugrel or ticagrelor                           | 1.017 (0.809–1.278) | 0.885          |
| ACEi or ARB                                       | 0.814 (0.634–1.046) | 0.108          |
| Beta-blocker                                      | 0.894 (0.675–1.184) | 0.434          |
| Statin                                            | 0.743 (0.518–1.067) | 0.108          |

CI, confidence interval; SBP, systolic blood pressure; CVA, cerebrovascular accident; Cr, creatinine; BMI, body mass index; AMI, acute myocardial infarction; LM, left main coronary artery; LAD, left anterior descending coronary artery; LCx, left circumflex coronary artery; RCA, right coronary artery; TIMI, thrombolysis in myocardial infarction; MI, myocardial infarction; LDL-C, low-density lipoprotein cholesterol; NA, not applicable; ACEi, angiotensin-converting enzyme inhibitor; ARB, angiotensin receptor blocker.
